# Amyloid $\beta$ Levels in Human Red Blood Cells

Takehiro Kiko<sup>1</sup>, Kiyotaka Nakagawa<sup>1</sup>, Akira Satoh<sup>2</sup>, Tsuyoshi Tsuduki<sup>3</sup>, Katsutoshi Furukawa<sup>4</sup>, Hiroyuki Arai<sup>4</sup>, Teruo Miyazawa<sup>1\*</sup>

**1** Food and Biodynamic Chemistry Laboratory, Graduate School of Agricultural Science, Tohoku University, Sendai, Japan, **2** Life Science Institute, Yamaha Motor Company, Ltd., Shizuoka, Japan, **3** Laboratory of Food and Biomolecular Science, Graduate School of Agricultural Science, Tohoku University, Sendai, Japan, **4** Department of Geriatrics and Gerontology, Institute of Development, Aging and Cancer, Tohoku University, Sendai, Japan

## Abstract

Amyloid  $\beta$ -peptide (A $\beta$ ) is hypothesized to play a key role by oxidatively impairing the capacity of red blood cells (RBCs) to deliver oxygen to the brain. These processes are implicated in the pathogenesis of Alzheimer's disease (AD). Although plasma A $\beta$  has been investigated thoroughly, the presence and distribution of A $\beta$  in human RBCs are still unclear. In this study, we quantitated A $\beta$ 40 and A $\beta$ 42 in human RBCs with ELISA assays, and provided evidence that significant amounts of A $\beta$  could be detected in RBCs and that the RBC A $\beta$  levels increased with aging. The RBC A $\beta$  levels increased with aging. On the other hand, providing an antioxidant supplement (astaxanthin, a polar carotenoid) to humans was found to decrease RBC A $\beta$  as well as oxidative stress marker levels. These results suggest that plasma A $\beta$ 40 and A $\beta$ 42 bind to RBCs (possibly with aging), implying a pathogenic role of RBC A $\beta$ . Moreover, the data indicate that RBC A $\beta$ 40 and A $\beta$ 42 may constitute biomarkers of AD. As a preventive strategy, therapeutic application of astaxanthin as an A $\beta$ -lowering agent in RBCs could be considered as a possible anti-dementia agent.

**Trial Registration:** Controlled-Trials.com ISRCTN42483402

**Citation:** Kiko T, Nakagawa K, Satoh A, Tsuduki T, Furukawa K, et al. (2012) Amyloid  $\beta$  Levels in Human Red Blood Cells. PLoS ONE 7(11): e49620. doi:10.1371/journal.pone.0049620

**Editor:** Soroku Yagihashi, Hirosaki University Graduate School of Medicine, Japan

**Received:** June 22, 2012; **Accepted:** October 10, 2012; **Published:** November 15, 2012

**Copyright:** © 2012 Kiko et al. This is an open-access article distributed under the terms of the Creative Commons Attribution License, which permits unrestricted use, distribution, and reproduction in any medium, provided the original author and source are credited.

**Funding:** A part of this study was supported by KAKENHI (S) (20228002, to TM) of the Japan Society for the Promotion of Science (JSPS), Japan. <http://www.jsp.go.jp/j-grantsinaid/>. The funders had no role in study design, data collection and analysis, decision to publish, or preparation of the manuscript. No additional external funding received for this study.

**Competing Interests:** One of the authors (AS) is employed by a commercial company (Life Science Institute, Yamaha Motor Co., Ltd.). This does not alter the authors' adherence to all the PLOS ONE policies on sharing data and materials.

\* E-mail: [miyazawa@biochem.tohoku.ac.jp](mailto:miyazawa@biochem.tohoku.ac.jp)

## Introduction

Alzheimer's disease (AD) is the most common form of dementia. Since AD is associated with the progressive accumulation of amyloid  $\beta$ -peptide (A $\beta$ ) in the human brain, a pathogenic role of A $\beta$  in the brain has been widely recognized [1,2].

Over the last decade or so, the presence of Amyloid  $\beta$ -peptide (A $\beta$ ) in peripheral blood plasma has received increasing attention [3–6], and plasma A $\beta$  is hypothesized to readily contact red blood cells (RBCs) and impair the capacity of RBCs in circulating human blood [7,8]. Our group and other researchers have investigated the hypothesis, and found that A $\beta$  induces oxidative injury to RBC by binding to them, and causing accumulation of phospholipid hydroperoxides (PLOOH), a specific marker for RBC membrane oxidative injury [9,10]. A $\beta$  also induces the binding of erythrocytes to endothelial cells and decreases endothelial viability, perhaps by the generation of oxidative and inflammatory stress [11]. These studies [9–11] provide a possibility that A $\beta$  plays a key role in blood and oxidatively impairs RBC function (e.g., oxygen delivery to the brain), thereby potentially facilitating AD. However, to the best of our knowledge, no extensive study of the presence and distribution of A $\beta$  in human RBC has been undertaken.

The aim of this study was to ascertain the distribution of A $\beta$  in the RBCs of young and senior subjects by applying a commercial ELISA assay. The RBC A $\beta$  concentrations were compared

between young and senior subjects and also compared to plasma A $\beta$  levels. In addition, we previously conducted a randomized, double-blind, placebo-controlled human study to evaluate whether nutritional supplementation with the antioxidant astaxanthin (a polar carotenoid) affected RBC PLOOH [12]. Thus, RBCs that had been obtained from the human study [12] were subjected to A $\beta$  determination in order to evaluate the relationship between RBC A $\beta$  and the antioxidant/oxidant profile.

## Materials and Methods

### Ethics Statement

The study was conducted in accordance with the Declaration of Helsinki and approved by the Ethics Committee of the Anti-Aging Science (Tokyo, Japan; ethics No. I030807). All of the subjects provided written informed consent to the experimental protocol before participating in the study.

### Blood Samples from Young and Senior Volunteers

Twenty-four young healthy human volunteers [12 men and 12 women, between 22 and 29 years of age (mean  $\pm$  SE, 24.2 $\pm$ 0.6)] and 38 senior healthy volunteers [20 men and 18 women, between 48 and 69 years of age (mean  $\pm$  SE, 56.2 $\pm$ 1.0)] participated in this study. Blood was collected into a tube containing EDTA-2Na as an anticoagulant and was subjected to centrifugation at 1,000 *g* for ten min at 4°C. After the plasma and buffy coat were removed,

RBCs were washed three times with phosphate buffered saline (PBS, pH 7.4) to prepare packed cells.

### Measurement of A $\beta$ 40 and A $\beta$ 42 in RBCs and Plasma

For determination of A $\beta$ 40 and A $\beta$ 42 in RBCs, human  $\beta$  Amyloid (1–40) ELISA kits (WAKO, Osaka, Japan) and human  $\beta$  Amyloid (1–42) ELISA kits (WAKO) were used, respectively. These kits are commercially available and used worldwide. We tested conditions for measurement of RBC A $\beta$ , and the optimized protocol is as follows. Packed cells (200  $\mu$ L) were mixed with 200  $\mu$ L of water and one mL of 70% formic acid. A 40  $\mu$ L aliquot was collected and mixed with 760  $\mu$ L of 1 mol/L Tris-HCl with protease inhibitors, and the mixture was diluted two-fold with the standard diluent present in each A $\beta$ 40 and A $\beta$ 42 ELISA kit. A 100  $\mu$ L aliquot was subjected to either the A $\beta$ 40 or the A $\beta$ 42 ELISA kit (in triplicate). Briefly, aliquots (100  $\mu$ L) were transferred to BAN50-coated (specific for the N-terminal portion of human A $\beta$ 1-16) 96 well microplates and incubated overnight at 4°C. After washing five times with the kit's wash solution, HRP-conjugated BA27 (specific for the C-terminal portion of human A $\beta$ 40) or HRP-conjugated BC05 (specific for the C-terminal portion of human A $\beta$ 42) was added and incubated at 4°C for one h. After washing in the same manner, TMB solution from the ELISA kit was added and incubated for 30 min. Stop solution in each A $\beta$ 40 and A $\beta$ 42 ELISA kit was added and absorbance was read at 450 nm using a microplate reader (GENios, TECAN Co., Ltd.). For plasma A $\beta$ 40 and A $\beta$ 42, these were determined according to the ELISA kit protocol.

### Previous Human Study Protocol

As described above, we previously conducted a randomized, double-blind, placebo controlled human study to evaluate whether antioxidant supplementation (astaxanthin) affected RBC phospholipid peroxidation [12]. In this study, blood samples (RBC and plasma) that had been obtained from the human study [12] were subjected to A $\beta$  determination. That previous human study protocol was organized as follows. A total of 30 healthy subjects (15 men and 15 women), between 50 and 69 years of age (mean  $\pm$  SE, 56.3 $\pm$ 1.0), randomly received zero mg (placebo), six mg, or 12 mg antioxidant (astaxanthin, Puresta<sup>®</sup>, Yamaha Motor Co., Ltd.; Shizuoka, Japan). During the 12-week trial, subjects ingested one of the three astaxanthin doses (zero, six, or 12 mg) capsules with an appropriate amount of water once daily after breakfast. Before and after the supplementation period (weeks zero and 12), blood samples were collected from the subjects. From the blood samples, RBC and plasma were prepared, and their PLOOH and antioxidants (carotenoids and tocopherols) were measured by HPLC techniques [9,12–16].

### Statistical Analyses

Data are presented as means  $\pm$  SE. Differences in A $\beta$  concentrations between young and senior subjects were compared using Student's *t*-test or Welch's *t*-test for equal or unequal variances; the Mann-Whitney *U* test was used when the distribution was skewed. For correlation analysis, Pearson's correlation coefficient test for normal data or Spearman's rank correlation coefficient test for nonparametric data was used. A difference was considered significant at  $P < 0.05$ .

## Results

### RBC A $\beta$ in Young Human Volunteers

The ELISA assay kit is designed to be used for the quantitative determination of A $\beta$ 40 and A $\beta$ 42 in human fluid samples

including plasma, CSF, tissue homogenate, and tissue culture media [3,17–19]. The ELISA kit was developed by Suzuki et al. and shows extremely high sensitivity and reproducibility [20]. Using the kit, we found that A $\beta$  could be detected in RBC packed cells. Therefore, conditions for the measurement of RBC A $\beta$ 40 and A $\beta$ 42 were optimized, and A $\beta$ 40 and A $\beta$ 42 levels in RBCs of young healthy volunteers were determined. As a result, RBC A $\beta$  concentrations were calculated to be 5.32 $\pm$ 0.21 pmol/g hemoglobin for A $\beta$ 40 and 2.09 $\pm$ 0.06 pmol/g hemoglobin for A $\beta$ 42 (Table 1). If A $\beta$  levels in RBC were compared to plasma, A $\beta$ 40 and A $\beta$ 42 levels in RBC were about 8 and 14 times higher than those of plasma, respectively. The experiments also confirmed that the RBC A $\beta$ 42/A $\beta$ 40 ratio was about 1.8 times higher than plasma (Table 1).

### Comparison of RBC A $\beta$ Concentrations between Young and Senior Subjects

It was found that the concentrations of RBC A $\beta$ 40 and A $\beta$ 42 in senior healthy volunteers were significantly higher than those of young healthy volunteers (Table 1). The plasma A $\beta$ 40 and A $\beta$ 42 in elderly subjects were also higher than those of young volunteers. When we analyzed the relationship between A $\beta$  in RBC and plasma, significant positive correlations were found (Fig. 1). On the other hand, RBC PLOOH levels in senior subjects were also higher than those of young volunteers.

### Astaxanthin Antioxidant Supplementation Trial: RBC A $\beta$ and the PLOOH Profile

As already reported in our former study [12], after human volunteers (senior subjects) received supplementation with the antioxidant astaxanthin, RBC astaxanthin concentrations were significantly increased and the RBC PLOOH concentration decreased. For other parameters, astaxanthin supplementation showed a safety profile with no side effects (e.g., death of RBC, leukocytosis, and inflammatory conditions) [12]. In the present study, we measured RBC A $\beta$ 40 and A $\beta$ 42 concentrations, and these levels were found to be significantly decreased after supplementation (Fig. 1A, Table 2). In addition, there were inverse relationships between RBC A $\beta$  and astaxanthin concentrations (Fig. 2). On the other hand, astaxanthin supplementation did not affect the levels of plasma A $\beta$ 40 and A $\beta$ 42 (Fig. 1B, Table 2). When we analyzed the relationship between RBC A $\beta$  and an oxidative stress marker (PLOOH), we found a significant positive correlation between RBC PLOOH and A $\beta$  concentrations (Fig. 3).

## Discussion

The brain is generally regarded as the origin of the A $\beta$  that is deposited in plaques of AD patients [5,21]. Plasma A $\beta$  and CSF concentrations are believed to be in a dynamic equilibrium [22,23], suggesting that increased A $\beta$  production in the brain could be associated with increased A $\beta$  concentrations in blood plasma. This means that brain A $\beta$  is transferred across the blood-brain barrier to the plasma [24,25]. As proof of the transfer, peripheral administration of anti-A $\beta$  antibody (m266) to PDAPP transgenic mice (AD-model mice) increased plasma A $\beta$  up to 1000-fold [26]. Additional evidence for the presence of A $\beta$  in blood plasma was obtained in studies of platelets [27]. As mentioned in the Introduction, our group and other researchers found that A $\beta$  is capable of binding to RBC *in vitro* as well as *in vivo* animal studies [9]. Thus, it is likely that A $\beta$  in peripheral blood plasma may readily contact RBC in circulating human blood.

**Table 1.** Amyloid  $\beta$  levels in RBC and plasma of young healthy human volunteers and senior subjects.

| Parameters                           | Young healthy human volunteers | Senior healthy human volunteers |
|--------------------------------------|--------------------------------|---------------------------------|
| Total number of subjects             | 24                             | 38                              |
| Males                                | 12                             | 20                              |
| Females                              | 12                             | 18                              |
| Age (years)                          | 24.2 $\pm$ 0.6                 | 56.2 $\pm$ 0.9                  |
| RBC A $\beta$ 40 (pmol/g hemoglobin) | 5.33 $\pm$ 0.21                | 8.16 $\pm$ 0.47*                |
| RBC A $\beta$ 42 (pmol/g hemoglobin) | 2.09 $\pm$ 0.06                | 3.81 $\pm$ 0.22*                |
| RBC A $\beta$ 42/40                  | 0.41 $\pm$ 0.03                | 0.51 $\pm$ 0.03*                |
| PLOOH (pmol/mL packed cells)         | 8.4 $\pm$ 0.7                  | 15.8 $\pm$ 1.2*                 |
| Plasma A $\beta$ 40 (pmol/g protein) | 0.669 $\pm$ 0.032              | 0.806 $\pm$ 0.029*              |
| Plasma A $\beta$ 42 (pmol/g protein) | 0.147 $\pm$ 0.006              | 0.242 $\pm$ 0.019*              |
| Plasma A $\beta$ 42/40               | 0.232 $\pm$ 0.013              | 0.298 $\pm$ 0.018               |

Means  $\pm$  SE are shown.  
 Significantly different between young healthy volunteers and senior subjects: \* $P$ <0.01.  
 doi:10.1371/journal.pone.0049620.t001

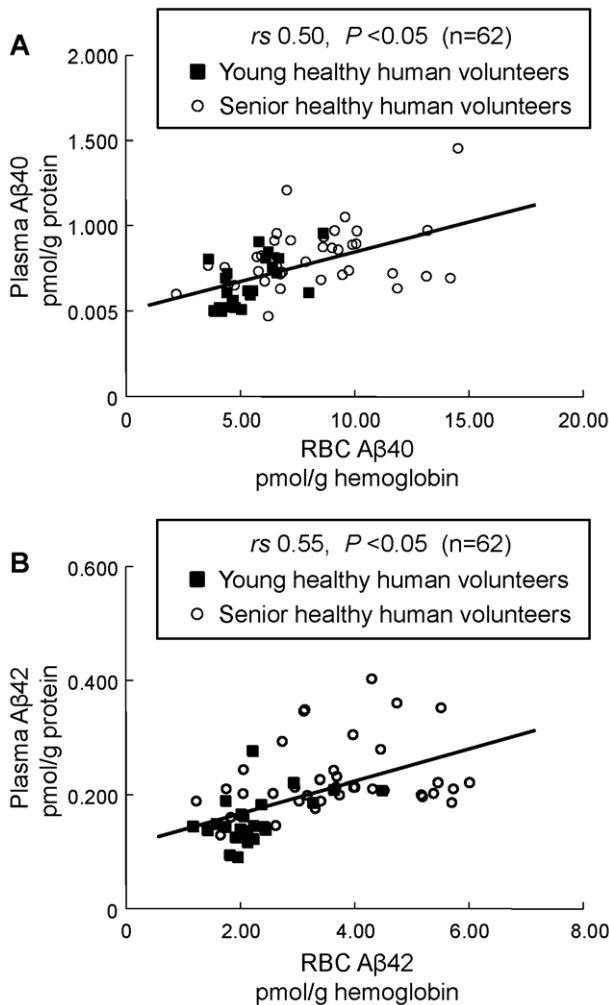

**Figure 1.** Correlation between RBC and plasma A $\beta$ 40 (A) or A $\beta$ 42 (B) concentrations of young healthy human volunteers and senior subjects (N=62). X-axis is the concentration of RBC A $\beta$ . Y-axis is concentration of plasma A $\beta$ .  
 doi:10.1371/journal.pone.0049620.g001

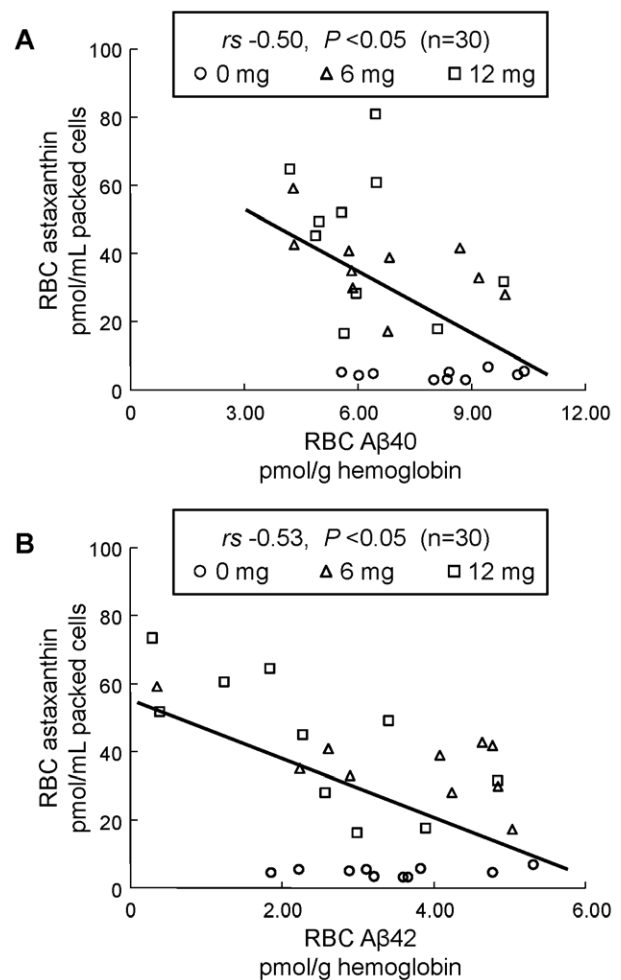

**Figure 2.** Correlation between RBC astaxanthin and A $\beta$ 40 (A) or A $\beta$ 42 (B) concentrations after 12 weeks administration of astaxanthin (N=30). X-axis is the concentration of RBC A $\beta$ . Y-axis is concentration of RBC astaxanthin that had been measured in our former human study [12].  
 doi:10.1371/journal.pone.0049620.g002

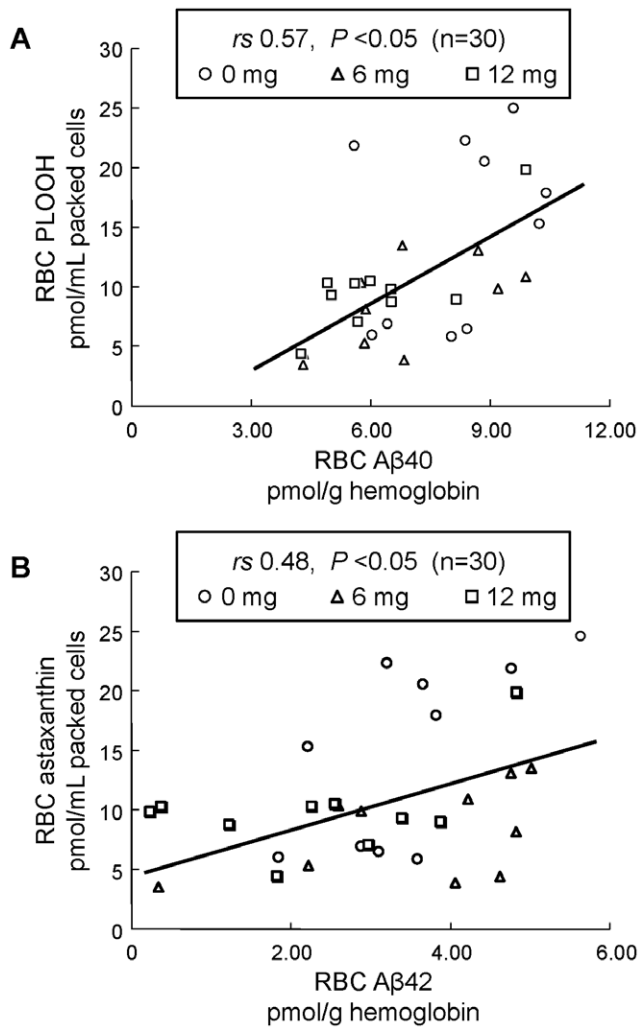

**Figure 3. Correlation between RBC PLOOH and A $\beta$ 40 (A) or A $\beta$ 42 (B) concentration after 12 weeks administration of astaxanthin (N=30).** X-axis is concentration of RBC A $\beta$ . Y-axis is concentration of RBC PLOOH [phosphatidylcholine hydroperoxide (PCOOH) and phosphatidylethanolamine hydroperoxide (PEOOH)] that had been measured in our former human study [12]. doi:10.1371/journal.pone.0049620.g003

Although plasma A $\beta$  has been investigated thoroughly in previous studies [1,5,21,28], little attention has been paid to RBC A $\beta$ . In the present study, we provide evidence that A $\beta$  is indeed present in human RBC. We found that RBC A $\beta$ 40 and A $\beta$ 42 levels in healthy human volunteers were about 8- and 14-times higher than plasma A $\beta$ 40 and A $\beta$ 42, respectively (Table 1), when RBC A $\beta$  levels per g hemoglobin were compared to plasma A $\beta$  levels per g protein. These results suggested that plasma A $\beta$ 42 and A $\beta$ 40 readily bind to RBC, and this may provide an explanation for lower concentrations of “unbound” A $\beta$ 42 and A $\beta$ 40 in human plasma [3]. In addition, the experiments confirmed that the RBC A $\beta$ 42/A $\beta$ 40 ratio was about 1.8-times higher than in plasma (Table 1). This may be related to the fact that A $\beta$ 42 interacts with RBC more avidly than A $\beta$ 40 [9,29], probably because two additional hydrophobic amino acids at the C-terminus of A $\beta$ 42 increase the rate of A $\beta$  insertion into the RBC bilayer [30].

We also found that RBC A $\beta$ 40 and A $\beta$ 42 levels in healthy elderly subjects were higher than in young volunteers. It was reported that brain as well as plasma A $\beta$  (A $\beta$ 40 and A $\beta$ 42) levels

**Table 2. Changes in Amyloid  $\beta$  levels in RBC and plasma before and after a 12 week administration of 0, 6 or 12 mg astaxanthin.**

| Parameters                           | 0 mg              | 6 mg              | 12 mg             |
|--------------------------------------|-------------------|-------------------|-------------------|
| Age                                  | 56.6 $\pm$ 1.4    | 56.3 $\pm$ 2.1    | 56.1 $\pm$ 1.6    |
| Total number of subjects             | 10                | 10                | 10                |
| Males                                | 5                 | 5                 | 5                 |
| Females                              | 5                 | 5                 | 5                 |
| RBC A $\beta$ 40 (pmol/g hemoglobin) |                   |                   |                   |
| Before administration                | 7.89 $\pm$ 0.46   | 8.13 $\pm$ 0.65   | 8.36 $\pm$ 0.55   |
| After administration                 | 8.23 $\pm$ 0.54   | 7.08 $\pm$ 0.56   | 6.31 $\pm$ 0.53*  |
| RBC A $\beta$ 42 (pmol/g hemoglobin) |                   |                   |                   |
| Before administration                | 3.90 $\pm$ 0.29   | 4.24 $\pm$ 0.37   | 4.08 $\pm$ 0.55   |
| After administration                 | 3.69 $\pm$ 0.28   | 3.60 $\pm$ 0.34   | 2.40 $\pm$ 0.47*  |
| Plasma A $\beta$ 40 (pmol/g protein) |                   |                   |                   |
| Before administration                | 0.797 $\pm$ 0.050 | 0.817 $\pm$ 0.051 | 0.802 $\pm$ 0.034 |
| After administration                 | 0.804 $\pm$ 0.040 | 0.786 $\pm$ 0.052 | 0.747 $\pm$ 0.041 |
| Plasma A $\beta$ 42 (pmol/g protein) |                   |                   |                   |
| Before administration                | 0.223 $\pm$ 0.011 | 0.236 $\pm$ 0.031 | 0.266 $\pm$ 0.020 |
| After administration                 | 0.232 $\pm$ 0.021 | 0.204 $\pm$ 0.029 | 0.243 $\pm$ 0.021 |

Means  $\pm$  SE are shown.

Significantly different between before and after astaxanthin administration: \* $P$ <0.05.

Blood samples (RBC and plasma) that had been obtained from our former human study [12] were subjected to A $\beta$  determination.

doi:10.1371/journal.pone.0049620.t002

tend to increase according to age [31]. The age-related increase in plasma A $\beta$  could be connected to increases in A $\beta$  production or a reduction in A $\beta$  clearance in the brain. These shifts may be related to changes in the central or peripheral activity of A $\beta$  synthetic enzymes (e.g.,  $\beta$ -secretase or  $\gamma$ -secretase) or A $\beta$  catabolic enzymes (e.g., insulin-degrading enzyme or neprilysin) associated with aging. Therefore, the age-related enhanced binding of A $\beta$  to RBC may reflect age-dependent changes in A $\beta$  metabolism. Since significant positive correlations were observed between RBC and plasma A $\beta$  concentrations (Fig. 1), this may strengthen the hypothesis.

In order to supply oxygen to the brain, RBCs must deform as they pass through the narrow pores of capillaries. However, RBC deformability reportedly decreases when A $\beta$  adheres to RBC [32]. Thus, the interaction of A $\beta$  with RBC may decrease blood flow, impair oxygen delivery to the brain and contribute to brain hypoxia [32]. These processes are implicated in the pathogenesis of AD. In support of these notions, a relationship between blood (plasma) A $\beta$  and AD was observed in Down syndrome patients, among whom those with elevated A $\beta$  levels in plasma were reported to have a greater risk of developing AD [33]. Additional research (e.g., measurement of A $\beta$  levels in RBCs of AD patients) would be necessary to confirm these hypotheses.

On the other hand, as a preventive strategy, compounds that are capable of minimizing the accumulation of A $\beta$  in blood might be useful therapeutically. In this study, we showed that after astaxanthin supplementation, A $\beta$ 40 and A $\beta$ 42 concentrations in RBC (but not plasma) were significantly decreased (Fig. 1, Table 2).

In addition, inverse relationships between RBC A $\beta$  and astaxanthin levels were found (Fig. 2). Our previous *in vitro* and *in vivo* murine studies also indicated that carotenoid supplementation, especially astaxanthin, could attenuate A $\beta$ -induced oxidative stress in RBCs [9]. It is therefore likely that carotenoids (astaxanthin) act as antioxidants and/or reduce the binding of A $\beta$  to RBCs, thereby improving the resistance of RBCs to A $\beta$ -induced oxidative damage. For other carotenoid,  $\beta$ -carotene reportedly inhibited fibrillation and oligomerization of A $\beta$  [34,35], indicating a possibility that carotenoid moieties may bind to C-terminal portion of A $\beta$ , thereby inhibiting the binding of A $\beta$  to RBC. On the other hand, for currently unknown reasons, astaxanthin changed the levels of A $\beta$  in RBC but not in plasma. This may be related to A $\beta$  clearance from plasma, since excessive plasma A $\beta$  is reportedly cleared from the circulation by mainly hepatic A $\beta$  uptake through the interactions with liver low-density lipoprotein receptor-related protein (LRP-1) [36–38]. Further studies are needed to evaluate the effectiveness and mechanisms by which carotenoid (astaxanthin) could be beneficial for the treatment of dementia.

Studies have reported that A $\beta$  elicits neurotoxic activity via generation of reactive oxygen species (ROS) [39]. The mechanism by which A $\beta$  generates ROS is not fully understood, although one study implicates involvement of the methionine residue at position 35 of A $\beta$  [40]. If, indeed, A $\beta$  induces ROS, it could in turn trigger membrane oxidative injury in RBCs. Because A $\beta$  seems to cause RBC aggregation and hemolysis [9], it is plausible that A $\beta$ -induced hemolysis enhances a cascade of oxidative reactions in

RBC. These reactions produce superoxide, which dismutates to form hydrogen peroxide. These ROS cause formation and accumulation of RBC PLOOH, and this could increase membrane rigidity and decrease the deformability of RBCs. In concordance with these considerations, positive correlations between RBC A $\beta$  and PLOOH were found in the present study (Fig. 3).

In conclusion, we provided evidence that A $\beta$ 40 and A $\beta$ 42 concentrations were much higher in RBCs than in plasma and that RBC A $\beta$  levels increased with aging. We also found that after astaxanthin supplementation, there was a decrease in RBC A $\beta$  concentrations. The RBC A $\beta$  levels were positively correlated with RBC PLOOH, and inversely correlated with RBC astaxanthin. Based on the present findings, we are currently collecting the blood samples from living AD subjects to investigate the pathogenic roles of RBC A $\beta$  and usability of RBC A $\beta$  as biomarkers of AD. Also, we are investigating therapeutic application of carotenoids (astaxanthin) for possible anti-dementia agents. These results will be presented in the near future as a different study.

## Author Contributions

Conceived and designed the experiments: TK KN AS TT KF HA TM. Performed the experiments: TK. Analyzed the data: TK KN. Contributed reagents/materials/analysis tools: TK KN AS. Wrote the paper: TK KN TM.

## References

- de la Torre JC (2004) Is Alzheimer's disease a neurodegenerative or a vascular disorder? Data, dogma, and dialectics. *Lancet Neurol* 3: 184–190.
- Younkin SG (1995) Evidence that A beta 42 is the real culprit in Alzheimer's disease. *Ann Neurol* 37: 287–288.
- Scheuner D, Eckman C, Jensen M, Song X, Citron M, et al. (1996) Secreted amyloid beta-protein similar to that in the senile plaques of Alzheimer's disease is increased in vivo by the presenilin 1 and 2 and APP mutations linked to familial Alzheimer's disease. *Nat Med* 2: 864–870.
- Mehta PD, Pirttilä T, Mehta SP, Sersen EA, Aisen PS, et al. (2000) Plasma and cerebrospinal fluid levels of amyloid beta proteins 1–40 and 1–42 in Alzheimer disease. *Arch Neurol* 57: 100–105.
- van Oijen M, Hofman A, Soares HD, Koudstaal PJ, Breteler MM (2006) Plasma Abeta(1–40) and Abeta(1–42) and the risk of dementia: a prospective case-cohort study. *Lancet Neurol* 5: 655–660.
- Graff-Radford NR, Crook JE, Lucas J, Boeve BF, Knopman DS, et al. (2007) Association of low plasma Abeta42/Abeta40 ratios with increased imminent risk for mild cognitive impairment and Alzheimer disease. *Arch Neurol* 64: 354–362.
- Mattson MP, Begley JG, Mark RJ, Furukawa K (1997) Abeta25–35 induces rapid lysis of red blood cells: contrast with Abeta1–42 and examination of underlying mechanisms. *Brain Res* 771: 147–153.
- Mohanty JG, Eckley DM, Williamson JD, Launer LJ, Rifkind JM (2008) Do red blood cell-beta-amyloid interactions alter oxygen delivery in Alzheimer's disease? *Adv Exp Med Biol* 614: 29–35.
- Nakagawa K, Kiko T, Miyazawa T, Sookwong P, Tsuduki T, et al. (2011) Amyloid  $\beta$ -induced erythrocytic damage and its attenuation by carotenoids. *FEBS Lett* 585: 1249–1254.
- Jayakumar R, Kusiak JW, Chrest FJ, Demehin AA, Murali J, et al. (2003) Red cell perturbations by amyloid beta-protein. *Biochim Biophys Acta* 1622: 20–28.
- Nakagawa K, Kiko T, Kuriwada S, Miyazawa T, Kimura F, et al. (2011) Amyloid  $\beta$  induces adhesion of erythrocytes to endothelial cells and affects endothelial viability and functionality. *Biosci Biotechnol Biochem* 75: 2030–2033.
- Nakagawa K, Kiko T, Miyazawa T, Carpentero Burdeos G, Kimura F, et al. (2011) Antioxidant effect of astaxanthin on phospholipid peroxidation in human erythrocytes. *Br J Nutr* 105: 1563–1571.
- Kiko T, Nakagawa K, Tsuduki T, Suzuki T, Arai H, et al. (2012) Significance of lutein in red blood cells of Alzheimer's disease patients. *J Alzheimers Dis* 28: 593–600.
- Nakagawa K, Kiko T, Hatade K, Sookwong P, Arai H, et al. (2009) Antioxidant effect of lutein towards phospholipid hydroperoxidation in human erythrocytes. *Br J Nutr* 102: 1280–1284.
- Nakagawa K, Kiko T, Hatade K, Asai A., Kimura F, et al. (2008) Development of an HPLC-based assay for carotenoids in human red blood cells: application to clinical studies. *Anal Biochem* 381: 129–134.
- Miyazawa T, Suzuki T, Fujimoto K, Yasuda K (1992) Chemiluminescent simultaneous determination of phosphatidylcholine hydroperoxide and phosphatidylethanolamine hydroperoxide in the liver and brain of the rat. *J Lipid Res* 33: 1051–1059.
- Hosoda R, Saido TC, Otvos L Jr, Arai T, Mann DM, et al. (1998) Quantification of modified amyloid beta peptides in Alzheimer disease and Down syndrome brains. *J Neuropathol Exp Neurol* 57: 1089–1095.
- Borchelt DR, Thinakaran G, Eckman CB, Lee MK, Davenport F, et al. (1996) Familial Alzheimer's disease-linked presenilin 1 variants elevate Abeta1–42/1–40 ratio in vitro and in vivo. *Neuron* 17: 1005–1013.
- Moghekar A, Goh J, Li M, Albert M, O'Brien RJ (2012) Cerebrospinal fluid A $\beta$  and tau level fluctuation in an older clinical cohort. *Arch Neurol* 69: 246–250.
- Suzuki N, Cheung TT, Cai XD, Odaka A, Otvos L Jr, et al. (1994) An increased percentage of long amyloid beta protein secreted by familial amyloid beta protein precursor (beta APP717) mutants. *Science* 264: 1336–1340.
- Mayeux R, Honig LS, Tang MX, Manly J, Stern Y, et al. (2003) Plasma A[beta]40 and A[beta]42 and Alzheimer's disease: relation to age, mortality, and risk. *Neurology* 61: 1185–1190.
- Kawarabayashi T, Younkin LH, Saido TC, Shoji M, Ashe KH, et al. (2001) Age-dependent changes in brain, CSF, and plasma amyloid (beta) protein in the Tg2576 transgenic mouse model of Alzheimer's disease. *J Neurosci* 21: 372–381.
- Gherzi-Egea JF, Gorevic PD, Ghiso J, Frangione B, Patlak CS, et al. (1996) Fate of cerebrospinal fluid-borne amyloid beta-peptide: rapid clearance into blood and appreciable accumulation by cerebral arteries. *J Neurochem* 67: 880–883.
- Zlokovic BV (2004) Clearing amyloid through the blood-brain barrier. *J Neurochem* 89: 807–811.
- Eisele YS, Obermüller U, Heilbronner G, Baumann F, Kaeser SA, et al. (2010) Peripherally applied Abeta-containing inoculates induce cerebral beta-amyloidosis. *Science* 330: 980–982.
- DeMattos RB, Bales KR, Cummins DJ, Dodart JC, Paul SM, et al. (2001) Peripheral anti-A beta antibody alters CNS and plasma A beta clearance and decreases brain A beta burden in a mouse model of Alzheimer's disease. *Proc Natl Acad Sci U S A* 98: 8850–8855.
- Chen M, Inestrosa NC, Ross GS, Fernandez HL (1995) Platelets are the primary source of amyloid  $\beta$ -peptide in human blood. *Biochem Biophys Res Commun* 213: 96–103.
- Mehta PD, Pirttilä T, Mehta SP, Sersen EA, Aisen PS, et al. (2000) Plasma and cerebrospinal fluid levels of amyloid beta proteins 1–40 and 1–42 in Alzheimer disease. *Arch Neurol* 57: 100–105.
- Kuo YM, Kokjohn TA, Kalback W, Luchrs D, Galasko DR, et al. (2000) Amyloid-beta peptides interact with plasma proteins and erythrocytes:

- implications for their quantitation in plasma. *Biochem Biophys Res Commun* 268: 750–756.
30. Pillot T, Goethals M, Vanloo B, Talusot C, Brasseur R, et al. (1996) Fusogenic properties of the C-terminal domain of the Alzheimer beta-amyloid peptide. *J Biol Chem* 271: 28757–28765.
  31. Fukumoto H, Tennis M, Locascio JJ, Hyman BT, Growdon JH, et al. (2003) Age but not diagnosis is the main predictor of plasma amyloid beta-protein levels. *Arch Neurol* 60: 958–964.
  32. Mohanty JG, Eckley DM, Williamson JD, Launer LJ, Rifkind JM (2008) Do red blood cell-beta-amyloid interactions alter oxygen delivery in Alzheimer's disease? *Adv Exp Med Biol* 614: 29–35.
  33. Matsubara E, Ghiso J, Frangione B, Amari M, Tomidokoro Y, et al. (1999) Lipoprotein-free amyloidogenic peptides in plasma are elevated in patients with sporadic Alzheimer's disease and Down's syndrome. *Ann Neurol* 45: 537–541.
  34. Ono K, Yoshiike Y, Takashima A, Hasegawa K, Naiki H, et al. (2004) Vitamin A exhibits potent anti-amyloidogenic and fibril-destabilizing effects in vitro. *Exp Neurol* 189: 380–392.
  35. Takasaki J, Ono K, Yoshiike Y, Hirohata M, Ikeda T, et al. (2011) Vitamin A has anti-oligomerization effects on amyloid- $\beta$  in vitro. *J Alzheimers Dis* 27: 271–280.
  36. Hone E, Martins IJ, Fonte J, Martins RN (2003) Apolipoprotein E influences amyloid-beta clearance from the murine periphery. *J Alzheimers Dis* 5: 1–8.
  37. Ghiso J, Shayo M, Calero M, Ng D, Tomidokoro Y, et al. (2004) Systemic catabolism of Alzheimer's Abeta40 and Abeta42. *J Biol Chem* 279: 45897–45908.
  38. Tamaki C, Ohtsuki S, Terasaki T (2004) Systemic catabolism of Alzheimer's Abeta40 and Abeta42. *J Biol Chem* 279: 45897–45908.
  39. Butterfield DA (2002) Amyloid beta-peptide (1–42)-induced oxidative stress and neurotoxicity: implications for neurodegeneration in Alzheimer's disease brain. A review. *Free Radic Res* 36: 1307–1313.
  40. Varadarajan S, Yatin S, Kanski J, Jahanshahi F, Butterfield DA (1999) Methionine residue 35 is important in amyloid beta-peptide-associated free radical oxidative stress. *Brain Res Bull* 50: 133–141.
